# Supplementary material
Source: PubMed Central journal article supplement (PMC3842382)
Supplement: NIHMS497446-supplement-001.pdf [file NIHMS497446-supplement-001.pdf]

## Supporting Information

### **(Biphenyl-4-yl)methylammonium Chlorides: Potent Anticonvulsants That Modulate Na<sup>+</sup> Currents**

**Hyosung Lee,<sup>1,a</sup> Ki Duk Park,<sup>1,b</sup> Xiao-Fang Yang,<sup>2</sup> Erik T. Dustrude,<sup>4</sup> Sarah M. Wilson<sup>4</sup>,  
Rajesh Khanna,<sup>2,3,4</sup> and Harold Kohn<sup>1,5,\*</sup>**

From the <sup>1</sup>Division of Chemical Biology and Medicinal Chemistry, UNC Eshelman School of Pharmacy, and <sup>5</sup>Department of Chemistry, University of North Carolina, Chapel Hill, North Carolina 27599, and Departments of <sup>2</sup>Pharmacology & Toxicology and <sup>3</sup>Biochemistry & Molecular Biology, and <sup>4</sup>Program in Medical Neuroscience, Paul and Carole Stark Neurosciences Research Institute, Indiana University School of Medicine, Indianapolis, Indiana 46202, USA

#### \*CORRESPONDING AUTHORS FOOTNOTE

From the Division of Chemical Biology and Medicinal Chemistry, UNC Eshelman School of Pharmacy, University of North Carolina, Chapel Hill, North Carolina 27599-7568, and Department of Chemistry, University of North Carolina, Chapel Hill, North Carolina 27599-3290, E-mail: [hkohn@email.unc.edu](mailto:hkohn@email.unc.edu), Telephone: 919-843-8112, Fax: 919-966-0204

#### **Author Current Address**

<sup>a</sup> Cell Dynamics Research Center, Gwangju Institute of Science and Technology, Gwangju, Korea

<sup>b</sup> Center for Neuro-Medicine, Korea Institute of Science and Technology, Seoul, Korea

Supplementary Table 1. Receptor Binding Profiles for Compounds 2-11.<sup>a</sup>

| Cmpd No. <sup>b</sup> |                | 2     | 3     | 4     | 5     | 6     | 7     | 8     | 9     | 10    | 11    |
|-----------------------|----------------|-------|-------|-------|-------|-------|-------|-------|-------|-------|-------|
| Serotonergic          | 5-HT 1A        | 50.0  | 9.2   | 8.2   | -0.1  | 24.7  | 28.2  | 50.0  | 50.0  | 18.4  | 3.6   |
|                       | 5-HT 1B        | -8.2  | 7.9   | -16.5 | -15.2 | -9.1  | 35.0  | 6.2   | 10.3  | -11.4 | -16.4 |
|                       | 5-HT 1D        | 16.7  | 3.3   | -0.9  | -4.3  | 9.9   | 38.5  | 20.1  | 50.0  | ND    | -4.4  |
|                       | 5-HT 1E        | 7.8   | ND    | -4.3  | -4.8  | -14.1 | ND    | ND    | -6.0  | -7.0  | -6.0  |
|                       | 5-HT 2A        | 50.9  | 59.2  | 76.6  | 53.0  | 56.2  | 83.8  | 51.9  | 51.5  | 80.6  | 14.9  |
|                       | 5-HT 2B        | 42.8  | 34.4  | 70.6  | 16.8  | 33.1  | 49.8  | 67.8  | 31.9  | 40.3  | -7.8  |
|                       | 5-HT 2C        | 6.4   | 28.0  | 39.9  | 80.8  | 28.7  | 16.3  | 6.1   | 0.6   | 18.8  | -0.8  |
|                       | 5-HT 3         | -1.3  | -1.4  | 0.0   | 10.7  | 7.1   | 15.7  | 25.2  | -12.6 | 7.5   | -11.4 |
|                       | 5-HT 5A        | 32.2  | 66.2  | 62.3  | 22.8  | 77.4  | 64.8  | 48.6  | 51.9  | 73.1  | 70.9  |
|                       | 5-HT 6         | 12.1  | 9.2   | 5.0   | 34.4  | 25.6  | 44.6  | 35.3  | 42.8  | 31.3  | 25.4  |
| 5-HT 7                | 80.7           | 24.2  | 53.8  | 69.9  | 90.8  | 39.5  | 88.2  | 66.8  | 58.3  | 81.5  |       |
| Adrenergic            | Alpha 1A       | -8.1  | 1.3   | -11.4 | -16.5 | -10.7 | 4.9   | -7.7  | -5.3  | -8.8  | -0.8  |
|                       | Alpha 1B       | -14.7 | -19.4 | -6.9  | -17.8 | -11.8 | -13.1 | -11.8 | -16.2 | -3.6  | -1.4  |
|                       | Alpha 1D       | -19.9 | -14.4 | -1.1  | -11.4 | -14.3 | 18.1  | -12.4 | -9.5  | -1.5  | 4.0   |
|                       | Alpha 2A       | 53.4  | 57.2  | 56.9  | 56.8  | ND    | 70.7  | 75.9  | 75.1  | 68.8  | 81.6  |
|                       | Alpha 2B       | 50.6  | 59.8  | 46.0  | 22.4  | -0.1  | 59.8  | 33.2  | 32.0  | 52.5  | 18.5  |
|                       | Alpha 2C       | 47.8  | 53.1  | 53.3  | 41.8  | 48.0  | 51.4  | 23.5  | 0.2   | 65.5  | 88.4  |
|                       | Beta 2         | 13.0  | 21.1  | 5.0   | 9.5   | 1.8   | 58.9  | 7.1   | 13.8  | 40.1  | -7.0  |
|                       | Beta 3         | -9.1  | 1.5   | 17.7  | 2.2   | 9.1   | 16.7  | -17.5 | 0.7   | 16.0  | 19.0  |
| BZP                   | Rat Brain Site | -16.5 | 0.3   | 1.9   | 0.2   | -4.6  | -0.1  | 5.7   | -0.3  | -1.9  | -1.9  |
|                       | PBR            | 2.0   | 17.8  | 13.5  | -3.2  | 1.8   | 21.6  | 10.4  | 32.1  | 11.5  | -1.2  |
|                       | GABA A         | -18.7 | -18.6 | -14.2 | -10.8 | -15.9 | -19.1 | -17.6 | -10.4 | -2.8  | ND    |
| Dopaminergic          | D1             | -9.3  | -4.4  | 3.7   | 0.1   | -6.8  | 5.6   | 9.9   | 4.5   | 5.8   | 3.4   |
|                       | D2             | -9.2  | 7.9   | 19.7  | 6.1   | 12.6  | 67.9  | -7.5  | -15.0 | 16.1  | -6.5  |
|                       | D3             | 40.2  | 33.9  | 13.0  | 19.4  | 25.2  | 89.8  | 62.5  | 20.8  | 58.2  | 55.9  |
|                       | D4             | 49.1  | 38.1  | 36.1  | 67.3  | 12.3  | 96.3  | 50.0  | 5.4   | 51.9  | -7.4  |
|                       | D5             | -13.1 | -10.8 | -4.2  | -4.1  | -0.8  | -7.6  | 0.9   | 9.6   | 0.3   | 3.8   |
| Opioid                | DOR            | 1.1   | 7.3   | 11.0  | 17.0  | 24.0  | 19.0  | 22.0  | 7.7   | 29.0  | 20.0  |
|                       | KOR            | 39.6  | 52.0  | 64.3  | -0.2  | 8.0   | 51.5  | 42.4  | 45.0  | 3.5   | 44.2  |
|                       | MOR            | -8.7  | 9.0   | 14.4  | -4.1  | 30.0  | 23.2  | 47.7  | -5.6  | 31.0  | 51.6  |
| Sigma                 | Sigma 1        | 92.4  | ND    | 79.8  | 85.1  | 85.4  | 87.9  | 95.6  | 95.7  | 92.7  | 31.2  |
|                       | Sigma 2        | 41.9  | ND    | 74.8  | 81.5  | 63.0  | 87.5  | 90.3  | 88.1  | 85.2  | 8.6   |
| Histamine             | H1             | -2.8  | 11.8  | 13.7  | -2.2  | 10.6  | 74.6  | 10.1  | 4.0   | 19.2  | -13.0 |
|                       | H2             | -5.7  | -16.3 | -13.9 | ND    | ND    | 8.8   | 28.5  | -3.9  | -16.2 | ND    |
|                       | H3             | 29.1  | 25.6  | 33.2  | -2.7  | -5.0  | 15.9  | -12.8 | -6.2  | -5.1  | 3.8   |
| Muscarinic            | M1             | -1.2  | 50.0  | 50.0  | 27.4  | 52.6  | 0.8   | -8.4  | -14.0 | 12.1  | 63.6  |
|                       | M2             | -7.2  | -2.7  | 4.6   | 17.3  | 25.8  | -6.8  | -9.5  | -8.3  | 3.2   | 20.6  |
|                       | M3             | -16.5 | 2.9   | -1.6  | 2.5   | -4.3  | -12.8 | -15.9 | -20.3 | 4.1   | -21.5 |
|                       | M4             | -0.1  | -6.2  | -7.1  | -0.8  | -5.8  | -2.6  | -7.2  | -1.0  | -6.3  | -5.2  |
|                       | M5             | -1.1  | 0.8   | 5.8   | 2.8   | 7.4   | 1.7   | -3.6  | ND    | 12.4  | 3.9   |
| Transporter           | DAT            | 63.4  | 74.0  | 40.0  | 66.3  | 51.9  | 53.9  | 75.1  | 58.4  | 73.2  | 8.2   |
|                       | NET            | 87.3  | 86.6  | 74.4  | 76.5  | 83.5  | 72.5  | 85.0  | 84.9  | 96.8  | 17.5  |
|                       | SERT           | 79.0  | 99.2  | ND    | 96.1  | 95.0  | 90.1  | 101.7 | 80.3  | 102.8 | -0.4  |

<sup>a</sup> Data represent mean % inhibition (N = 4 determinations) for compound tested at receptor subtypes. Significant inhibition is considered > 50%. In cases where negative inhibition (-) is seen, this represents a stimulation of binding. Occasionally, compounds at high concentrations will non-specifically increase binding. The default concentration for primary binding experiments is 10  $\mu$ M. <sup>b</sup> Compound number. ND; not determined.
